# Supplementary material
Source: Springer Nature journal article supplement (https://www.springermedizin.de/resource/supplementary/12936_2005_196_MOESM2_ESM.pdf/9547150)

# Mulago III Parish

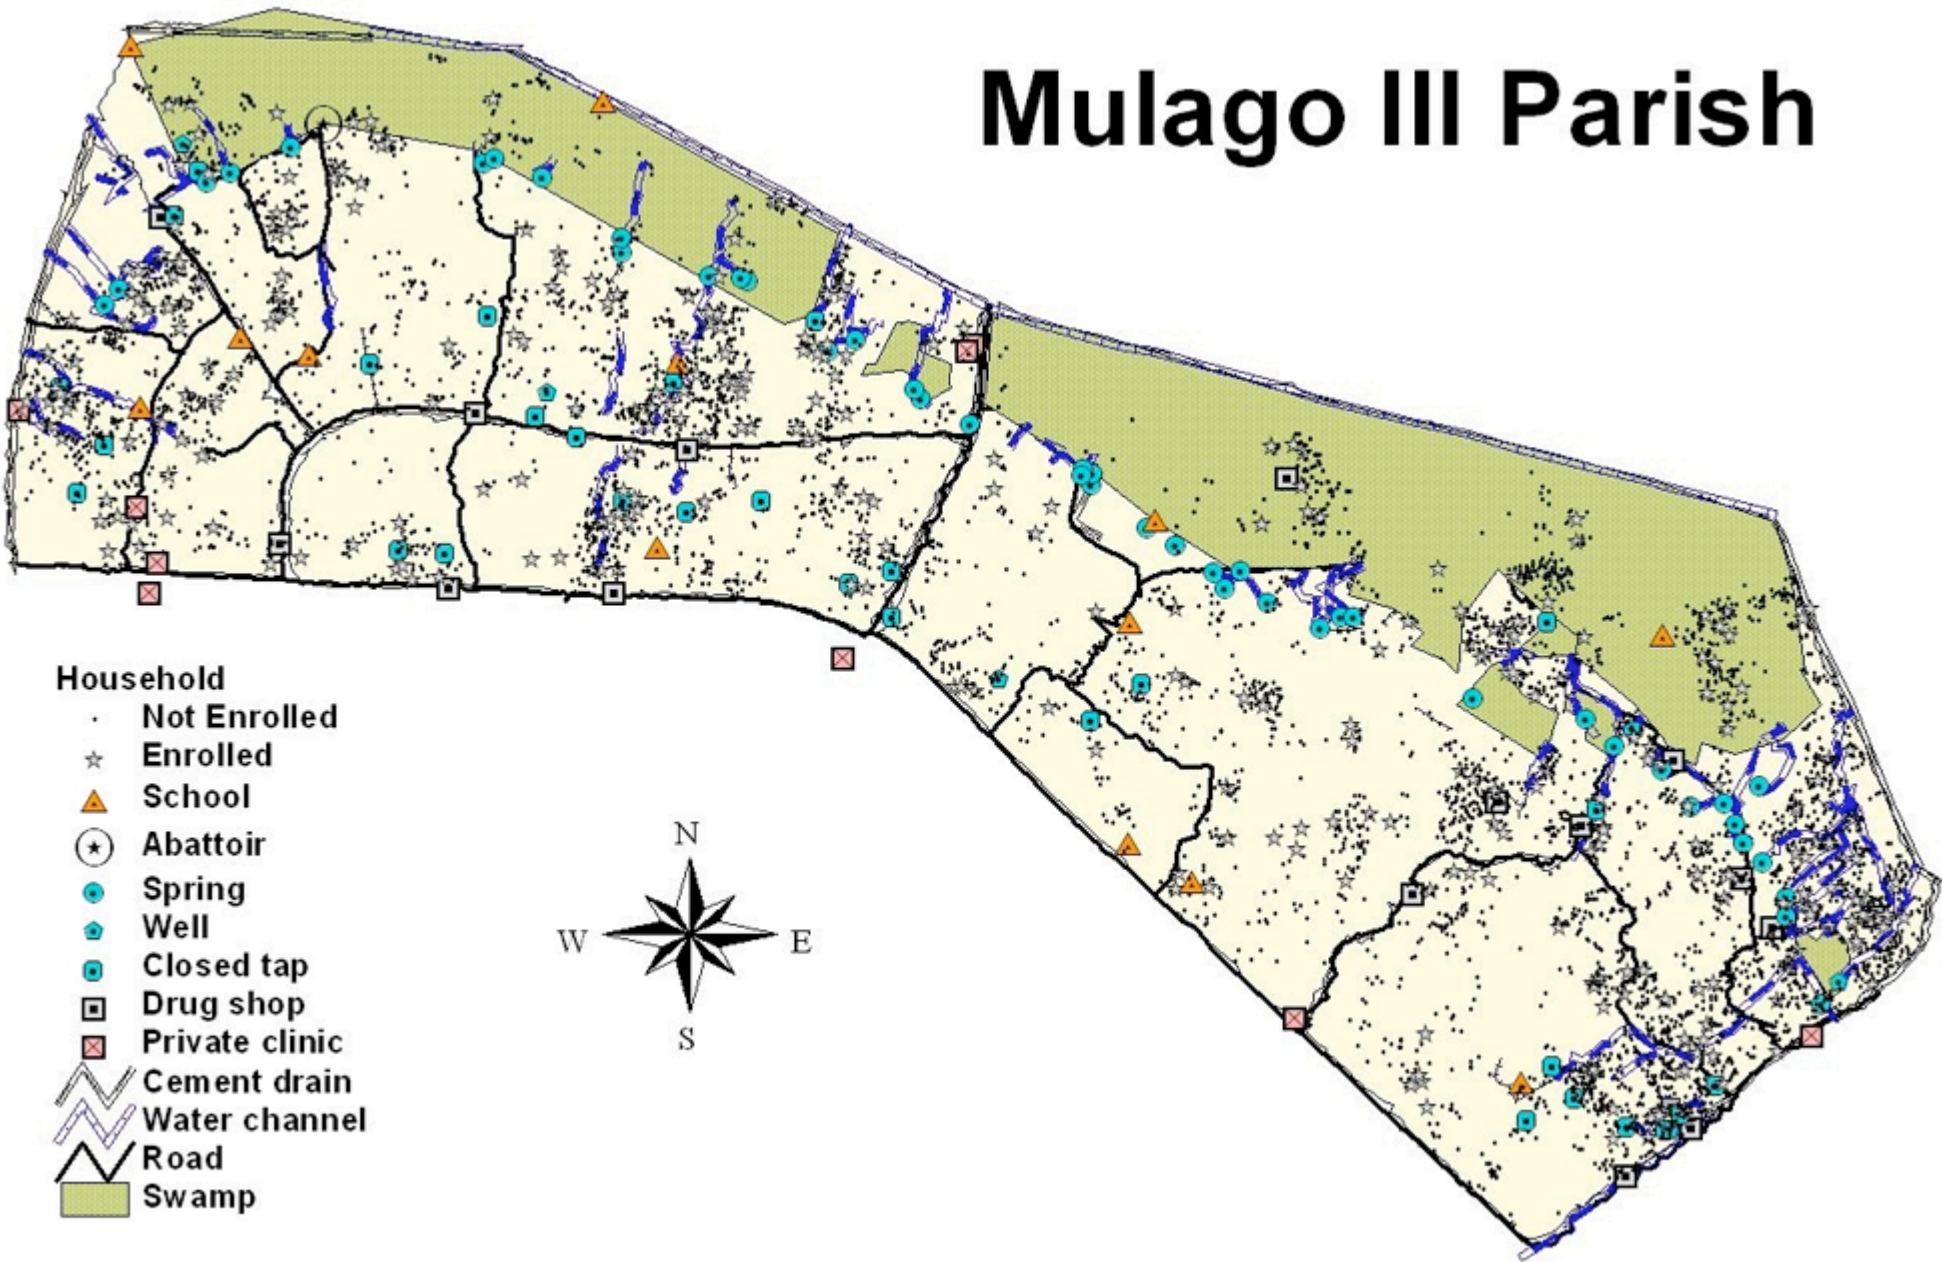

- Household**
- Not Enrolled
  - ☆ Enrolled
  - ▲ School
  - ⊛ Abattoir
  - Spring
  - Well
  - Closed tap
  - Drug shop
  - ⊠ Private clinic
  - ≡ Cement drain
  - ≡ Water channel
  - ≡ Road
  - Swamp

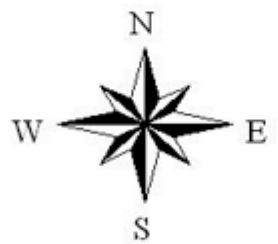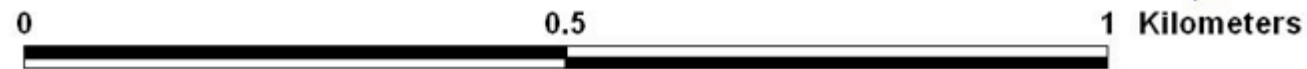

Supplement: MOESM2 [file 9547150]
